# Supplementary material
Source: PubMed Central journal article supplement (PMC10411049)

**Figure S1.** Standard 1.5% agarose DNA gel electrophoresis of all amplicons studied (IL-5R total, IL-5RTm, IL-5Rsol, MBP1, GATA-1).

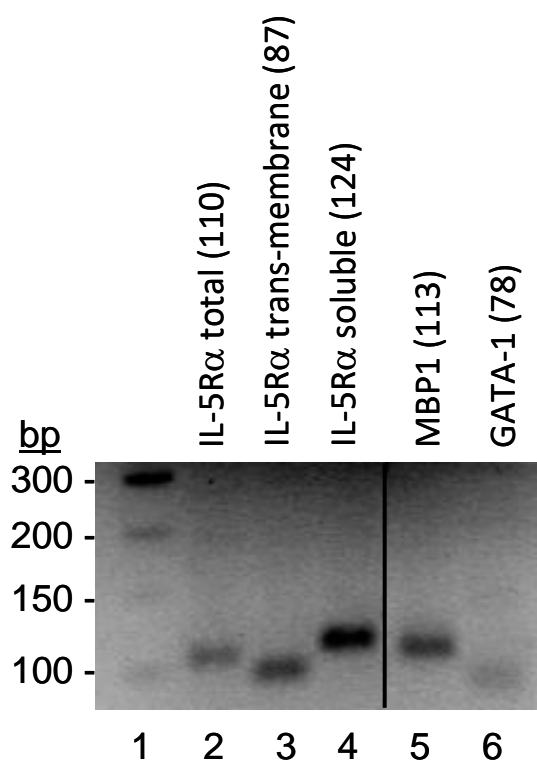

Supplement: NIHMS1912994-supplement-Supplemental_Figure_S1.pdf [file NIHMS1912994-supplement-Supplemental_Figure_S1.pdf]
